# Supplementary material
Source: PubMed Central journal article supplement (PMC6653689)
Supplement: NIHMS1529952-supplement-Supplemental_Material.pdf [file NIHMS1529952-supplement-Supplemental_Material.pdf]

**SUPPLEMENTAL MATERIAL**

**Supplemental Table 1. Study population.**

| <b>Variables</b>                            | <b>All Patients (N=205)</b> |
|---------------------------------------------|-----------------------------|
| <b>Demographics</b>                         |                             |
| Age at transplant, y (mean, SD)             | 50.6 ± 12.8                 |
| Women                                       | 64 (31.2%)                  |
| <b>Pre-Transplant Clinical Diagnosis</b>    |                             |
| Non-ischemic cardiomyopathy*                | 97 (47.3%)                  |
| Ischemic cardiomyopathy†                    | 47 (22.9%)                  |
| Anthracycline-induced heart disease         | 11 (5.4%)                   |
| Cardiac sarcoidosis                         | 10 (4.9%)                   |
| Hypertrophic cardiomyopathy                 | 10 (4.9%)                   |
| Congenital heart disease                    | 9 (4.4%)                    |
| Valvular heart disease‡                     | 6 (2.9%)                    |
| Restrictive cardiomyopathy§                 | 5 (2.4%)                    |
| Myocarditis                                 | 5 (2.4%)                    |
| Arrhythmogenic cardiomyopathy               | 2 (1.0%)                    |
| Cardiac amyloidosis                         | 2 (1.0%)                    |
| Radiation-induced heart disease             | 1 (0.5%)                    |
| <b>Post-Transplant Histologic Diagnosis</b> |                             |
| Dilated cardiomyopathy                      | 84 (41.0%)                  |
| Ischemic cardiomyopathy#                    | 46 (22.4)                   |
| Hypertrophic cardiomyopathy**               | 19 (9.3%)                   |

|                                     |            |
|-------------------------------------|------------|
| Anthracycline-induced heart disease | 11 (5.4%)  |
| Cardiac sarcoidosis††               | 10 (4.9%)  |
| Congenital heart disease            | 9 (4.4%)   |
| Arrhythmogenic cardiomyopathy       | 8 (3.9%)   |
| Valvular heart disease‡‡            | 6 (2.9%)   |
| Myocarditis§§                       | 6 (2.9%)   |
| Restrictive cardiomyopathy          | 3 (1.5%)   |
| Cardiac amyloidosis                 | 2 (1.0%)   |
| Radiation-induced heart disease     | 1 (0.5%)   |
| <b>Pre-Transplant Imaging</b>       |            |
| FDG PET performed                   | 18 (8.8%)  |
| Cardiac MRI performed               | 31 (15.1%) |
| FDG PET and Cardiac MRI performed   | 7 (3.4%)   |

(\* ) Includes: idiopathic, familial, presumed familial, genetic (Becker’s muscular dystrophy, glycogen storage disease, phospholamban mutation, Danon disease, Noonan syndrome, MHY7 mutation, LMNA mutation, BAG3 mutation), peripartum, familial vs. peripartum, presumed Chagas-induced, presumed alcohol-induced. (†) Includes: mixed ischemic and valvular, non-atherosclerotic coronary artery disease (CAD) (traumatic coronary artery dissection, peripartum coronary artery dissection, antiphospholipid antibody syndrome (APLAS)), mixed ischemic and familial. (‡) Includes non-ischemic cardiomyopathy in part valvular. (§) Includes familial restrictive, idiopathic restrictive. (||) Includes: idiopathic, genetic (Becker’s muscular dystrophy, glycogen storage disease, phospholamban mutation, Danon disease, LMNA mutation, BAG3

mutation), peripartum. (#) Includes mixed ischemic and valvular, mixed ischemic and dilated, non-atherosclerotic CAD (traumatic coronary artery dissection, peripartum coronary artery dissection, APLAS). (\*\*) Includes Noonan syndrome with features of hypertrophic cardiomyopathy, mixed hypertrophic and ischemic, dilated cardiomyopathy from burned out hypertrophic cardiomyopathy. (††) Includes mixed cardiac sarcoidosis and ischemic. (‡‡) Includes mixed dilated and valvular. (§§) Includes restrictive secondary to acute lymphocytic myocarditis. (||||) Includes idiopathic with restrictive features. FDG, fluorodeoxyglucose. MRI, magnetic resonance imaging. PET, positron emission tomography.

**Supplemental Table 2. Pre-fluorodeoxyglucose positron emission tomography clinical history, fluorodeoxyglucose positron emission tomography sarcoidosis likelihood, and pre- and post-transplant diagnoses.**

| Subject Number | Notable History at Time of FDG PET                                             | FDG PET CS Likelihood Probability | Abnormal Extracardiac Uptake on FDG PET | Pre-Transplant Clinical Diagnosis   | Post-Transplant Histologic Diagnosis |
|----------------|--------------------------------------------------------------------------------|-----------------------------------|-----------------------------------------|-------------------------------------|--------------------------------------|
| 82             | HFrEF, VT, CHB, biopsy-proven CS                                               | Highly Probable                   | Yes                                     | CS                                  | CS                                   |
| 102            | HFrEF, VT/VF, pAF, CHB                                                         | Highly Probable                   | Yes                                     | CS                                  | CS                                   |
| 107            | HFrEF, CHB, CMR highly probable CS, biopsy-proven extracardiac sarcoidosis     | Highly Probable                   | Yes                                     | CS                                  | CS                                   |
| 137            | HFrEF, VT                                                                      | Highly Probable                   | Yes                                     | CS                                  | CS                                   |
| 157            | HFrEF, PVCs, CHB, biopsy-proven extracardiac sarcoidosis                       | Highly Probable                   | Yes                                     | CS                                  | CS                                   |
| 77             | HFrEF, pAF                                                                     | Probable                          | No                                      | NICMP                               | AC                                   |
| 186            | HFrEF, VT, OSH CMR concerning for ARVD                                         | Probable                          | No                                      | AC                                  | AC                                   |
| 198            | HFrEF, VT, pHTN                                                                | Probable                          | No                                      | CS                                  | AC                                   |
| 89             | HFrEF, VT, AF                                                                  | Probable                          | No                                      | NICMP                               | DCM                                  |
| 204            | HFrEF, VT, AF, non-obstructive CAD                                             | Probable                          | No                                      | CS                                  | DCM                                  |
| 12             | HFrEF, VT/VF, CHB, non-obstructive CAD, biopsy-proven extracardiac sarcoidosis | Probable                          | No                                      | CS                                  | CS                                   |
| 23             | HFrEF, pAF, non-obstructive CAD, CMR unlikely CS                               | Probable                          | No                                      | RCMP                                | HCM                                  |
| 140            | HFrEF, PVCs, pAF, pulmonary sarcoidosis (not biopsy-proven)                    | Probable                          | No                                      | CS                                  | Multifocal lymphocytic myocarditis   |
| 158            | HFpEF, pAF/pAFL, immune-mediated myositis, CMR highly probable CS              | Probable                          | No                                      | RCMP                                | RCMP                                 |
| 60             | HFrEF, VT, LMNA mutation, CMR unlikely CS                                      | Possible                          | No                                      | LMNA-CMP                            | LMNA-CMP                             |
| 178            | HFrEF, pAFL, CHB, CMR possible CS                                              | Possible                          | No                                      | LMNA-CMP                            | LMNA-CMP                             |
| 114            | HFpEF, PVCs, pAF, CHB, non-obstructive CAD, CMR unlikely CS                    | Possible                          | No                                      | RCMP due to lymphocytic myocarditis | RCMP due to lymphocytic myocarditis  |
| 162            | HFrEF, CMR highly probable CS                                                  | Possible                          | No                                      | NICMP                               | DCM                                  |

Notable clinical history at time of fluorodeoxyglucose (FDG) positron emission tomography (PET), FDG PET cardiac sarcoidosis probability, pre-transplant clinical diagnosis, and post-transplant histologic diagnosis for all patients (N=18) who underwent FDG PET during pre-transplant course. Listed first from highest to lowest probability, second by frequency. AC, arrhythmogenic cardiomyopathy. AF, atrial fibrillation. AFL, atrial flutter. ARVD,

arrhythmogenic right ventricular dysplasia. CAD, coronary artery disease. CHB, complete heart block. CMR, cardiac magnetic resonance imaging. CS, cardiac sarcoidosis. DCM, dilated cardiomyopathy. FDG, fluorodeoxyglucose. HCM, hypertrophic cardiomyopathy. HFpEF, heart failure with preserved ejection fraction. HFrEF, heart failure with reduced ejection fraction. LMNA-CMP, LMNA-mutation related cardiomyopathy. NICMP, nonischemic cardiomyopathy. OSH, outside hospital. pAF, paroxysmal atrial fibrillation. pAFL, paroxysmal atrial flutter. PET, positron emission tomography. pHTN, pulmonary hypertension. PVCs, premature ventricular contractions. RCMP, restrictive cardiomyopathy. VF, ventricular fibrillation. VT, ventricular tachycardia.

**Supplemental Table 3. Pre-cardiac magnetic resonance imaging clinical history, cardiac magnetic resonance imaging sarcoidosis likelihood, and pre- and post-transplant diagnoses.**

| Subject Number | Notable History at Time of Cardiac MRI           | Cardiac MRI CS Likelihood Probability | Pre-Transplant Clinical Diagnosis      | Post-Transplant Histologic Diagnosis   |
|----------------|--------------------------------------------------|---------------------------------------|----------------------------------------|----------------------------------------|
| 107            | CHB, biopsy-proven extracardiac sarcoidosis      | Highly Probable                       | CS                                     | CS                                     |
| 133            | HFrEF, AF                                        | Highly Probable                       | NICMP                                  | End-stage HCM                          |
| 158            | HFpEF, pAF/pAFL, immune-mediated myositis        | Highly Probable                       | RCMP                                   | RCMP                                   |
| 162            | HFrEF                                            | Highly Probable                       | NICMP                                  | DCM                                    |
| 153            | HFrEF                                            | Probable                              | NICMP                                  | DCM                                    |
| 179            | HFrEF                                            | Probable                              | NICMP                                  | DCM                                    |
| 120            | HFrEF, CAD, APLAS                                | Probable                              | APLAS                                  | APLAS                                  |
| 151            | HFrEF, HCM, AF                                   | Probable                              | HCM                                    | End-stage HCM                          |
| 93             | HFrEF                                            | Possible                              | NICMP                                  | DCM                                    |
| 154            | HFrEF                                            | Possible                              | NICMP                                  | DCM                                    |
| 165            | HFrEF                                            | Possible                              | Presumed familial DCM                  | DCM                                    |
| 188            | HFrEF, AF                                        | Possible                              | NICMP                                  | DCM                                    |
| 178            | HFrEF, pAFL, CHB                                 | Possible                              | LMNA-CMP                               | LMNA-CMP                               |
| 37             | HFrEF, non-obstructive CAD                       | Unlikely                              | NICMP                                  | DCM                                    |
| 122            | HFrEF                                            | Unlikely                              | Presumed peripartum CMP                | DCM                                    |
| 138            | HFrEF                                            | Unlikely                              | NICMP                                  | DCM                                    |
| 144            | HFrEF                                            | Unlikely                              | NICMP                                  | DCM                                    |
| 60             | HFrEF, VT, LMNA mutation                         | Unlikely                              | LMNA-CMP                               | LMNA-CMP                               |
| 183            | HFrEF, VT                                        | Unlikely                              | Peripartum CMP                         | Peripartum CMP                         |
| 5              | HFrEF, CAD s/p CABG, AF                          | Unlikely                              | ICMP                                   | ICMP                                   |
| 18             | HFrEF, CAD s/p CABG, AS s/p AVR, AF              | Unlikely                              | Mixed ICMP and valvular cardiomyopathy | Mixed ICMP and valvular cardiomyopathy |
| 172            | HFrEF, CAD                                       | Unlikely                              | ICMP                                   | ICMP                                   |
| 23             | HFrEF, pAF, non-obstructive CAD                  | Unlikely                              | RCMP                                   | HCM                                    |
| 68             | HCM                                              | Unlikely                              | HCM                                    | HCM                                    |
| 173            | HFpEF, HCM                                       | Unlikely                              | HCM                                    | End-stage HCM                          |
| 85             | HFrEF, anthracycline exposure, severe MR s/p MVR | Unlikely                              | Anthracycline-induced heart disease    | Anthracycline-induced heart disease    |
| 175            | HFrEF, AF, anthracycline exposure                | Unlikely                              | Anthracycline-induced heart disease    | Anthracycline-induced heart disease    |
| 203            | HFrEF, pAF, anthracycline exposure               | Unlikely                              | Anthracycline-induced heart disease    | Anthracycline-induced heart disease    |
| 114            | HFpEF, PVCs, pAF, CHB, non-obstructive CAD       | Unlikely                              | RCMP due to lymphocytic myocarditis    | RCMP due to lymphocytic myocarditis    |

|     |                                                 |          |                                 |                                 |
|-----|-------------------------------------------------|----------|---------------------------------|---------------------------------|
| 180 | HFrEF, CAD, radiation exposure                  | Unlikely | Radiation-induced heart disease | Radiation-induced heart disease |
| 193 | HFpEF, situs inversus, ASD, pulmonary AVM, pHTN | Unlikely | Congenital heart disease        | Congenital heart disease        |

Notable clinical history at time of cardiac magnetic resonance imaging, cardiac magnetic resonance imaging cardiac sarcoidosis probability, pre-transplant clinical diagnosis, and post-transplant histologic diagnosis for all patients (N=31) who underwent cardiac magnetic resonance imaging during pre-transplant course. Listed first from highest to lowest probability, second by frequency. APLAS, antiphospholipid antibody syndrome. AS, aortic stenosis. ASD, atrial septal defect. CMP, cardiomyopathy. ICMP, ischemic cardiomyopathy. MR, mitral regurgitation. MRI, magnetic resonance imaging. MVR, mitral valve replacement. All other abbreviations as in Supplemental Table 2.

**Supplemental Table 4.** Fluorodeoxyglucose positron emission tomography and cardiac magnetic resonance imaging sarcoidosis likelihood, and post-transplant histologic diagnoses for all patients who underwent both studies.

| <b>Subject Number</b> | <b>FDG PET CS Likelihood Probability</b> | <b>Cardiac MRI CS Likelihood Probability</b> | <b>Post-Transplant Histologic Diagnosis</b> |
|-----------------------|------------------------------------------|----------------------------------------------|---------------------------------------------|
| 23                    | Probable                                 | Unlikely                                     | HCM                                         |
| 60                    | Possible                                 | Unlikely                                     | LMNA-CMP                                    |
| 107                   | Highly Probable                          | Highly Probable                              | CS                                          |
| 114                   | Possible                                 | Unlikely                                     | RCMP due to lymphocytic myocarditis         |
| 158                   | Probable                                 | Highly Probable                              | RCMP                                        |
| 162                   | Possible                                 | Highly Probable                              | DCM                                         |
| 178                   | Possible                                 | Possible                                     | LMNA-CMP                                    |

Fluorodeoxyglucose positron emission tomography and cardiac magnetic resonance imaging sarcoidosis likelihood, and post-transplant histologic diagnoses for all patients who underwent both studies in the cohort (N=7). Listed in Subject Number order. CS, cardiac sarcoidosis. DCM, dilated cardiomyopathy. FDG, fluorodeoxyglucose. HCM, hypertrophic cardiomyopathy. LMNA-CMP, LMNA-mutation related cardiomyopathy. MRI, magnetic resonance imaging. PET, positron emission tomography. RCMP, restrictive cardiomyopathy.
